# Supplementary material for: Selection of Unique Molecules for Cancer Treatment by Distance-Based Method: Hypericin Effect on Respiratory Chain
Source: MDPI journal article supplement (doi:10.3390/biophysica1020017), 2021-06-08
Supplement: s1 [file s1]

Archive with 1 entries (1 files):
- biophysica-1167981-supplementary.pdf
